# Supplementary material
Source: publisher figshare collection journal article supplement (https://future-science-group.figshare.com/ndownloader/files/32076176)
Supplement: Supplementary file 1 [file 32076176]

**Supplemental material – Survey Questions**

**DEMOGRAPHICS**

1. Which of the following degrees do you have? (Select all that apply)

Advanced practice provider (ARNP/PA, etc)

Pharmacist (BS Pharm, PharmD)

Physician (DO/MD)

1. How long have you been licensed in your profession?

Less than 5 years

5-10 years

More than 10 years

1. Where is your primary clinical practice site located?

Tampa General Hospital and/or affiliated clinics

USF Health and/or affiliated clinics

1. What is your clinical specialty (Select all that apply)?

Family medicine

Internal medicine

Cardiology

Gastroenterology

General Internal Medicine

Hematology and Medical Oncology

Hospice and Palliative Medicine

Hospital Medicine

Infectious diseases

Rheumatology

Neurology

Obstetrics and Gynecology

Orthopaedics and Sports Medicine

Pediatrics

Psychiatry

Surgery

Transplant

**PERCEPTIONS OF PHARMACOGENETICS**

1. Clinical utility of pharmacogenetic testing (Strongly disagree, disagree, neither agree or disagree, agree, strongly agree)
   - I believe pharmacogenetic testing can be used to optimize medications in my current clinical practice
2. Competency in applying pharmacogenetic results to patient care (Strongly disagree, disagree, neither agree or disagree, agree, strongly agree)
   - I am confident in my ability to interpret and apply pharmacogenetic results to patient care
3. Awareness of pharmacogenetic resources (Strongly disagree, disagree, undecided, agree, strongly agree)
   - I am aware of clinically reputable resources and/or guidelines on how to apply pharmacogenetic results to patient care

**CURRENT PRACTICES IN UTILIZING PHARMACOGENETIC TESTING**

1. In the past 12 months, have you ordered a pharmacogenetic test for a patient?

Yes  No

*If YES to 5, go to 6; if NO to 5, go to 7*

1. What laboratory did you use to order the pharmacogenetic test (Select all that apply)?

Other (please specify): _______________

1. Did you know that USF Health currently has a Pharmacogenomics Clinic?

Yes  No

**INTEREST IN IMPLEMENTING PHARMACOGENOMICS IN PRACTICE**

1. Based on the medications encountered in your clinical practice, rank your interest in the following gene-drug pairs to help the pharmacogenomics task force prioritize their implementation efforts (Not at all interested, Moderately interested, extremely interested)

Carbamazepine/oxcarbazepine and HLA-B/HLA-A gene

Clopidogrel and *CYP2C19* gene to guide antiplatelet therapy selection

Codeine/tramadol and *CYP2D6* gene to guide prediction of efficacy or adverse drug effects

Fluoropyrimidines and *DPYD* gene to guide dose and minimize toxicity

NSAIDs and *CYP2C9* gene to guide dosing and minimize adverse drug effects

Ondansetron and *CYP2D6* gene to guide prediction of efficacy

Phenytoin and *HLA-B/CYP2C9* gene to prevent adverse drug effect and guide dosing

Proton pump inhibitors and *CYP2C19* gene to guide dosing

Psychiatric medications (SSRIs, TCAs, antipsychotics) and *CYP2C19/CYP2D6* gene to guide dosing

Simvastatin and *SLCO1B1* gene to predict risk of myopathy

Thiopurines (azathioprine, mercaptopurine, thioguanine) and *TPMT* gene to guide dosing and prediction of myelosuppression

Voriconazole and *CYP2C1*9 gene to guide dosing for treatment of invasive fungal infections or prophylaxis and prevent subtherapeutic levels

Tacrolimus and *CYP3A5* gene to guide dosing

Warfarin and *CYP2C9/VKORC1/CYP4F2/CYP2C cluster* gene to guide dosing

1. What other gene-drug pair would you be interested in that is not provided in the list from question 11?
2. Would you be interested in integrating pharmacogenetics into your service/practice?

Yes  No

IF yes to 13 then go to 14

1. Please provide us with your information if you are willing to serve as an early adopter and have a member of our team contact you.
   - First name:
   - Last name:
   - Service/practice:
   - Email:
2. What barriers are there to using pharmacogenetic testing in your current service/practice? (Select all that apply)

No established and/or clear guidelines/protocols for interpreting and applying results

Limited scientific evidence supporting pharmacogenomic information in clinical care

Limited professional education and/or familiarity of the clinical applications of pharmacogenetics

Lack of reimbursement and/or high cost of pharmacogenetic testing

Access to or availability of pharmacogenetic testing options at TGH/USF Health

Turnaround time on pharmacogenetic testing is not practical

Infrastructure to support electronic medical record integration of results and clinical decision support tools

Concerns for handling ethical, legal, and social implications of testing results

No barriers exist in my practice/service

Other (please specify): _________________________

1. What pharmacogenomic educational opportunities would you be interested in? (Select all that apply)

Grand rounds

In-services

Continuing education credits

Newsletters

Staff meetings

Not interested at this time

Thank you for taking the time to complete the survey.
